# Supplementary material for: Mechano-chromic and mechano-enhanced electrogenerated chemiluminescence of tetra[4-(4-cyanophenyl)phenyl]ethene
Source: Royal Society of Chemistry journal article supplement (doi:10.1039/d2cc04735g), 2022-01-01
Supplement: d2cc04735g1.pdf [file d2cc04735g1.pdf]

## Supporting Information

### **Mechano-chromic and mechano-enhanced electrogenerated chemiluminescence of tetra[4-(4-cyanophenyl)phenyl]ethene**

Xiaofei Wang<sup>a</sup>, Manping Qian<sup>a</sup>, Jiaying Jiang<sup>b</sup>, Qiang Gao<sup>a</sup>, Chengxiao Zhang<sup>a</sup> and  
Honglan Qi<sup>a\*</sup>

<sup>a</sup> Key Laboratory of Analytical Chemistry for Life Science of Shaanxi Province, School of Chemistry and Chemical Engineering, Shaanxi Normal University, Xi'an, 710119, P. R. China

<sup>b</sup> Key Laboratory for Macromolecular Science of Shaanxi Province, School of Materials Science and Engineering, Shaanxi Normal University, Xi'an, 710062, P. R. China

E-mail: honglanqi@snnu.edu.cn

## **Table of Contents**

### **1. Experimental Procedures**

|                                     |     |
|-------------------------------------|-----|
| 1.1 Apparatus                       | S-3 |
| 1.2 Preparation of samples          | S-3 |
| 1.3 ECL measurement and ECL imaging | S-4 |

### **2. Supplementary Figures**

|                                                                     |     |
|---------------------------------------------------------------------|-----|
| S1 FL data of crystal, ground, annealed and fumed TCPPE powder      | S-5 |
| S2 Electrochemistry and ECL data of crystal and ground TCPPE powder | S-7 |
| S3 Gray value for crystal and ground TCPPE powder modified GCE      | S-8 |
| S4 Crystal data and structure refinement for TCPPE                  | S-9 |

# 1. Experimental Procedures

## 1.1 Apparatus

A MPI-E ECL detector (Xi'an Remax Analysis Instruments Co. Ltd., China) and CHI 660D electrochemical workstation (Shanghai Chenhua Instrument Co., Ltd., China) were used for ECL and electrochemical measurements. ECL spectra were recorded on Princeton Instruments PyLon 100BX CCD camera coupled with an Acton SP2300 monochromator (Trenton, USA). The ECL images were captured using an Olympus IX 73 inverted microscopy (Olympus, Japan) coupled with Prime 95B complementary metal-oxide-semiconductor (Photometrics, USA). The ultraviolet-visible absorption spectra, fluorescence (FL) spectra, FL quantum yields ( $\Phi$ ) and lifetime ( $\tau$ ) were recorded on Fluorolog-3 fluorescence spectrophotometer (Horiba JY, USA). A time-correlated single photon counting (TCSPC) equipment was used to collect the lifetime data using a 401-nm laser as the excitation source (pulse duration <200 ps), and lifetimes were calculated using decay analysis software (DAS6) according to triexponential decay function. Absolute fluorescence quantum yields were determined with a calibrated integrating sphere system (errors <3%) under air conditions. The morphology of crystal and ground TCPPE powder were obtained from SU8220 scanning electron microscopy (HITACHI, Japan). The powder X-ray diffraction spectra were recorded on D8 Quest single-crystal X-ray Diffractometer (Brooker Co. Ltd., Germany). The thermal analysis data were recorded on were recorded on a SETARAM (C80) instrument (Setaram Co. Ltd., France).

## 1.2 Preparation of samples

Ground TCPPE powder was obtained by grinding 20 mg crystal TCPPE powder with a mortar and pestle. The grinding time was controlled by the observation of the FL emission color of TCPPE powders under UV lamp illumination. 1.0 mg crystal TCPPE powder (or 1.0 mg ground TCPPE powder) was dispersed into 1 mL water with ultrasonic to get 1.0 mg/mL TCPPE powder dispersion.

### 1.3 ECL measurements and ECL imaging

A traditional three-electrode configuration was employed in the ECL experiment, in which a glassy carbon electrode (GCE, 2 mm in diameter, unless stated otherwise) functioned as the working electrode, an Ag/AgCl (saturated KCl) electrode functioned as the reference electrode and a Pt wire functioned as the counter electrode.

For ECL measurement of crystal, ground, annealed and fumed TCPPE powder, 10  $\mu\text{L}$  of 1.0 mg/mL crystal, ground, annealed and fumed TCPPE powder dispersion was dropped onto the surface of GCE and dried at room temperature for measurement.

For simultaneous ECL imaging of both crystal and ground TCPPE powder modified GCE, the fabricated process is following. Firstly, a thin glass slice was pasted on the surface of GCE (3 mm in diameter) vertically to make it into two equal parts. Then 5  $\mu\text{L}$  of 1.0 mg/mL crystal TCPPE powder suspension was dropped onto upper half part of GCE and 5  $\mu\text{L}$  of 1.0 mg/mL ground TCPPE powder suspension was dropped onto bottom half part of GCE. When the modified GCE dried as a thin film, the thin glass slice was taken out and a sticker of hollow “3” was pasted on the surface of modified GCE. So the upper half part of “3” was filled with crystal TCPPE powder and the bottom half part of “3” was filled with ground TCPPE powder. Multi-potential steps technique was applied between 0 V and -1.75 V in 0.1 M PBS (pH 7.4) containing 50 mM  $\text{K}_2\text{S}_2\text{O}_8$  and the exposure time is 3 s.

## 2. Supplementary Figures

### S1 FL data of crystal, ground, annealed and fumed TCPPE powder

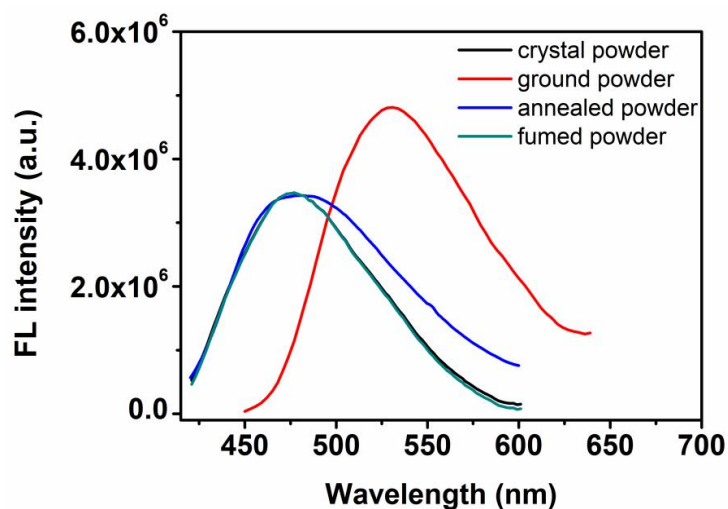

Fig. S1 FL spectra of crystal, ground, annealed and fumed TCPPE powder.

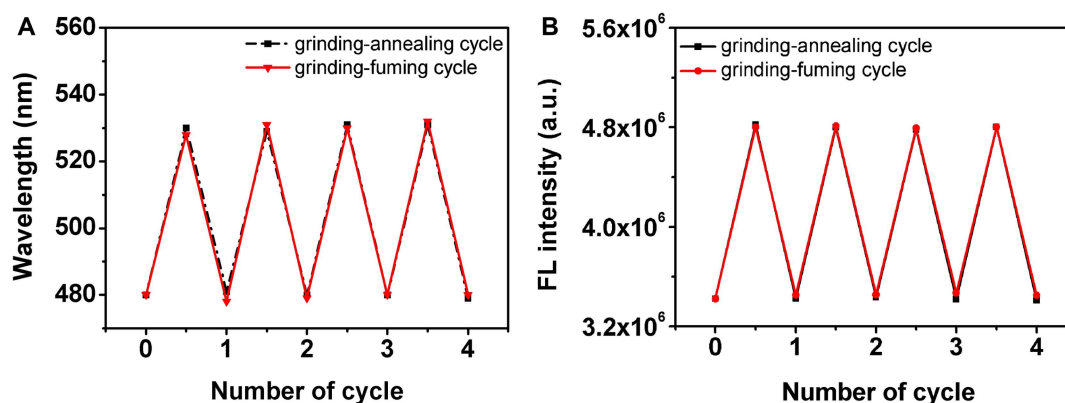

Fig. S2 Switching of (A) FL maximum wavelength and (B) FL intensity of TCPPE powder by repeated grinding-annealing process and grinding-fuming process.

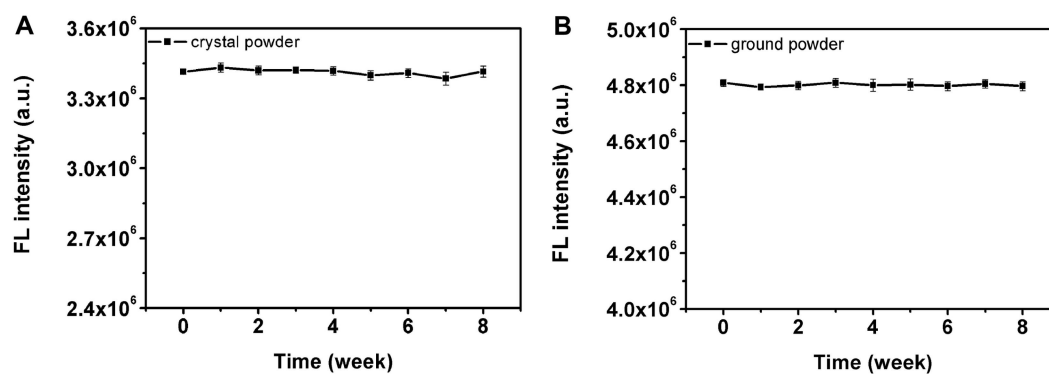

Fig. S3 FL stability of (A) crystal and (B) ground TCPPE powder in air at room temperature.

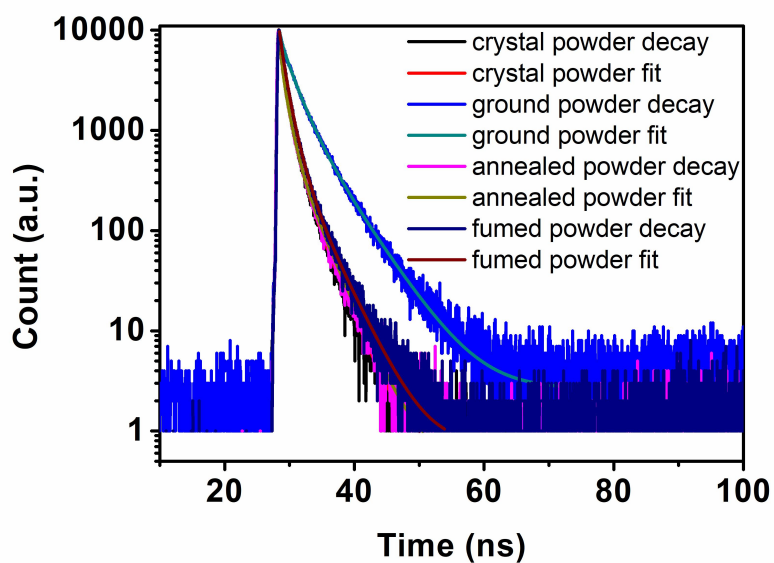

**Fig. S4** Lifetime decay curve of crystal, ground, annealed and fumed TCPPE powder in air at room temperature.

**Table S1** FL and ECL data for crystal, ground, annealed and fumed TCPPE powder

|                               | Crystal<br>TCPPE powder                           | Ground<br>TCPPE powder                           | Annealed<br>TCPPE powder                          | Fumed<br>TCPPE powder                             |
|-------------------------------|---------------------------------------------------|--------------------------------------------------|---------------------------------------------------|---------------------------------------------------|
| $\lambda_{em}$<br>(nm,<br>FL) | 480                                               | 530                                              | 477                                               | 480                                               |
| $\lambda_{em}$ (nm,<br>ECL)   | 478                                               | 528                                              | 478                                               | 478                                               |
| $\Phi_{FL}$                   | 73.4%                                             | 89.5%                                            | 72.9%                                             | 73.2%                                             |
| $\Phi_{ECL}$                  | 12.1%                                             | 75.5%                                            | 12.0%                                             | 12.4%                                             |
| Lifetime<br>(ns)              | 0.9 (0.3, 17.79%;<br>1.1, 53.02%;<br>2.7, 29.13%) | 2.3 (0.3, 1.77%;<br>2.0, 52.53%;<br>4.5, 45.70%) | 0.9 (0.3, 15.90%;<br>1.0, 53.02%;<br>3.0, 31.07%) | 1.1 (0.6, 20.69%;<br>1.2, 56.53%;<br>3.3, 22.77%) |

## S2 Electrochemistry and ECL data of crystal and ground TCPPE powder

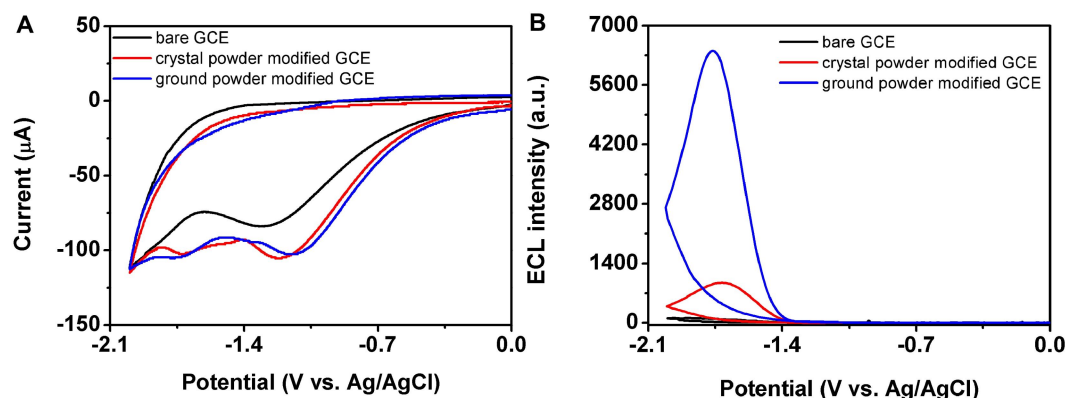

**Fig. S5** (A) Cyclic voltammograms for bare GCE, crystal and ground TCPPE powder modified GCE in 0.1 M PBS (pH 7.4) containing 50 mM  $\text{K}_2\text{S}_2\text{O}_8$ . Scan rate: 0.1 V/s. (B) ECL intensity vs. potential profiles for bare GCE, crystal and ground TCPPE powder modified GCE in 0.1 M PBS (pH 7.4) containing 50 mM  $\text{K}_2\text{S}_2\text{O}_8$ . PMT= -500 V.

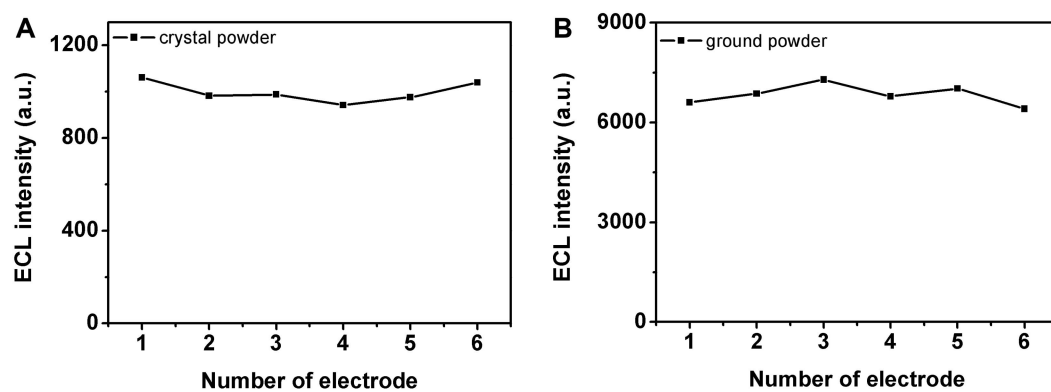

**Fig. S6** ECL stability of six (A) crystal and (B) ground TCPPE powder modified GCE in 0.1 M PBS (pH 7.4) containing 50 mM  $\text{K}_2\text{S}_2\text{O}_8$ . PMT= -500 V. ECL peak intensity was recorded at about -1.75 V using cyclic voltammetry technique.

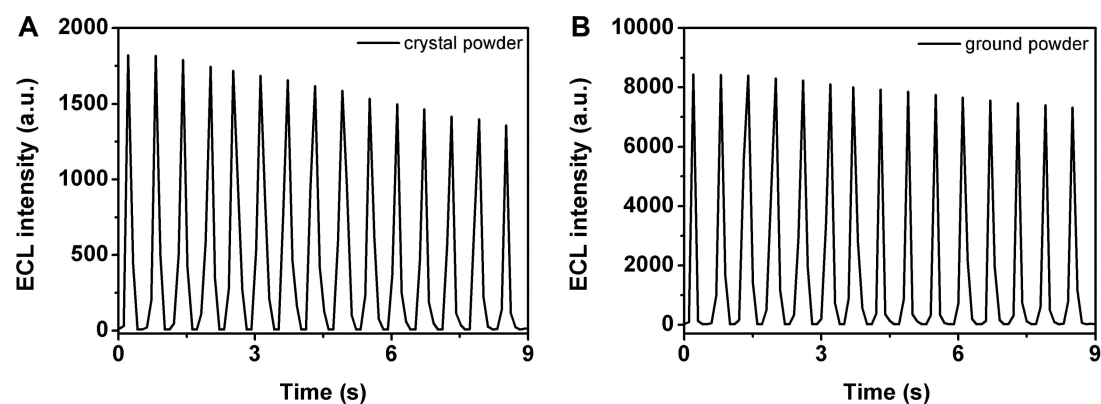

**Fig. S7** ECL intensity vs. time profiles of one (A) crystal and (B) ground TCPPE powder modified GCE in 0.1 M PBS (pH 7.4) containing 50 mM  $\text{K}_2\text{S}_2\text{O}_8$ . PMT= -500 V. Multi-potential steps technique was applied, low potential: -1.75 V; high potential: 0 V; pulse time: 0.3 s.

**S3 Gray value for crystal and ground TCPPE powder modified GCE**

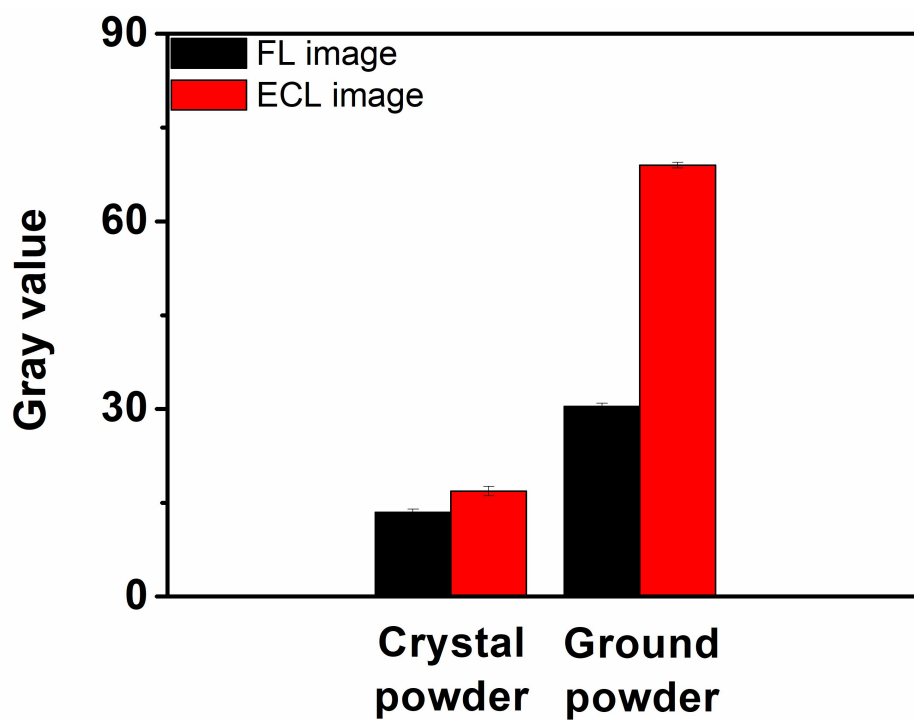

**Fig. S8** Gray value of FL and ECL images for crystal and ground TCPPE powder modified GCE.



## S4 Crystal data and structure refinement for TCPPE

Table S2 Crystal data and structure refinement for TCPPE

|                                             |                                                                               |
|---------------------------------------------|-------------------------------------------------------------------------------|
| CCDC number                                 | 2089575                                                                       |
| Empirical formula                           | C <sub>61</sub> H <sub>47</sub> Cl <sub>3</sub> N <sub>6</sub> O <sub>2</sub> |
| Formula weight                              | 1002.39                                                                       |
| Temperature/K                               | 152.0                                                                         |
| Crystal system, space group                 | Monoclinic, P2 <sub>1</sub> /n                                                |
| a/Å                                         | 20.0178 (11)                                                                  |
| b/Å                                         | 8.9301(5)                                                                     |
| c/Å                                         | 30.0676 (17)                                                                  |
| α/°                                         | 90                                                                            |
| β/°                                         | 102.188 (3)                                                                   |
| γ/°                                         | 90                                                                            |
| Volume/Å <sup>3</sup>                       | 5253.8 (5)                                                                    |
| Z                                           | 4                                                                             |
| ρ <sub>calc</sub> g/cm <sup>3</sup>         | 1.267                                                                         |
| μ/mm <sup>-1</sup>                          | 1.970                                                                         |
| F(000)                                      | 2088.0                                                                        |
| Radiation                                   | CuKα (λ = 1.54178)                                                            |
| 2θ range for data collection/°              | 4.868 to 136.71                                                               |
| Index ranges                                | -24 ≤ h ≤ 24, -10 ≤ k ≤ 10, -36 ≤ l ≤ 34                                      |
| Reflections collected                       | 75138                                                                         |
| Independent reflections                     | 9623 [R <sub>int</sub> = 0.0675, R <sub>sigma</sub> = 0.0377]                 |
| Data/restraints/parameters                  | 9623/294/726                                                                  |
| Goodness-of-fit on F <sup>2</sup>           | 1.647                                                                         |
| Final R indexes [I >= 2σ (I)]               | R <sub>1</sub> = 0.1193, wR <sub>2</sub> = 0.3483                             |
| Final R indexes [all data]                  | R <sub>1</sub> = 0.1343, wR <sub>2</sub> = 0.3731                             |
| Largest diff. peak/hole / e Å <sup>-3</sup> | 1.24/-1.48                                                                    |
